# Supplementary material
Source: Copernicus journal article supplement (doi:10.5194/egusphere-2026-2410)
Supplement: Supplementary file 1 [file egusphere-2026-2410-supplement.pdf]

*Supplement of*

## **Satellite Retrieval of Tropospheric NO<sub>2</sub> under Fire Conditions**

**Mengying Wang et al.**

*Correspondence to:* Jintai Lin (linjt@pku.edu.cn)

5

**Table S1. Geographic coordinates and altitudes of the PGN sites**

| PGN site                 | RichmondCA | MountainViewCA | WrightwoodCA |
|--------------------------|------------|----------------|--------------|
| Location latitude [deg]  | 37.9130    | 37.4200        | 34.3819      |
| Location longitude [deg] | -122.3360  | -122.0568      | -117.6813    |
| Location altitude [m]    | 5          | 50             | 2207         |

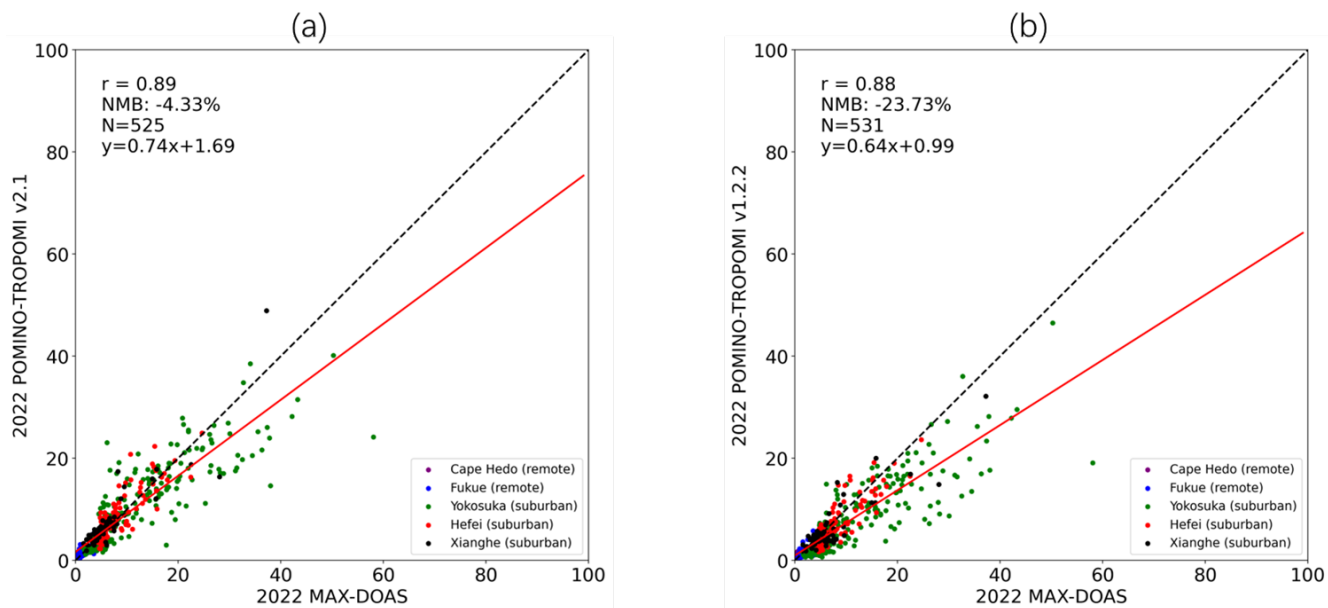

**Figure S1. Comparison of tropospheric NO<sub>2</sub> VCDs between POMINO-TROPOMI retrievals and MAX-DOAS observations in 2022. (a) POMINO-TROPOMI v2.1 versus MAX-DOAS. (b) POMINO-TROPOMI v1.2.2 versus MAX-DOAS.**

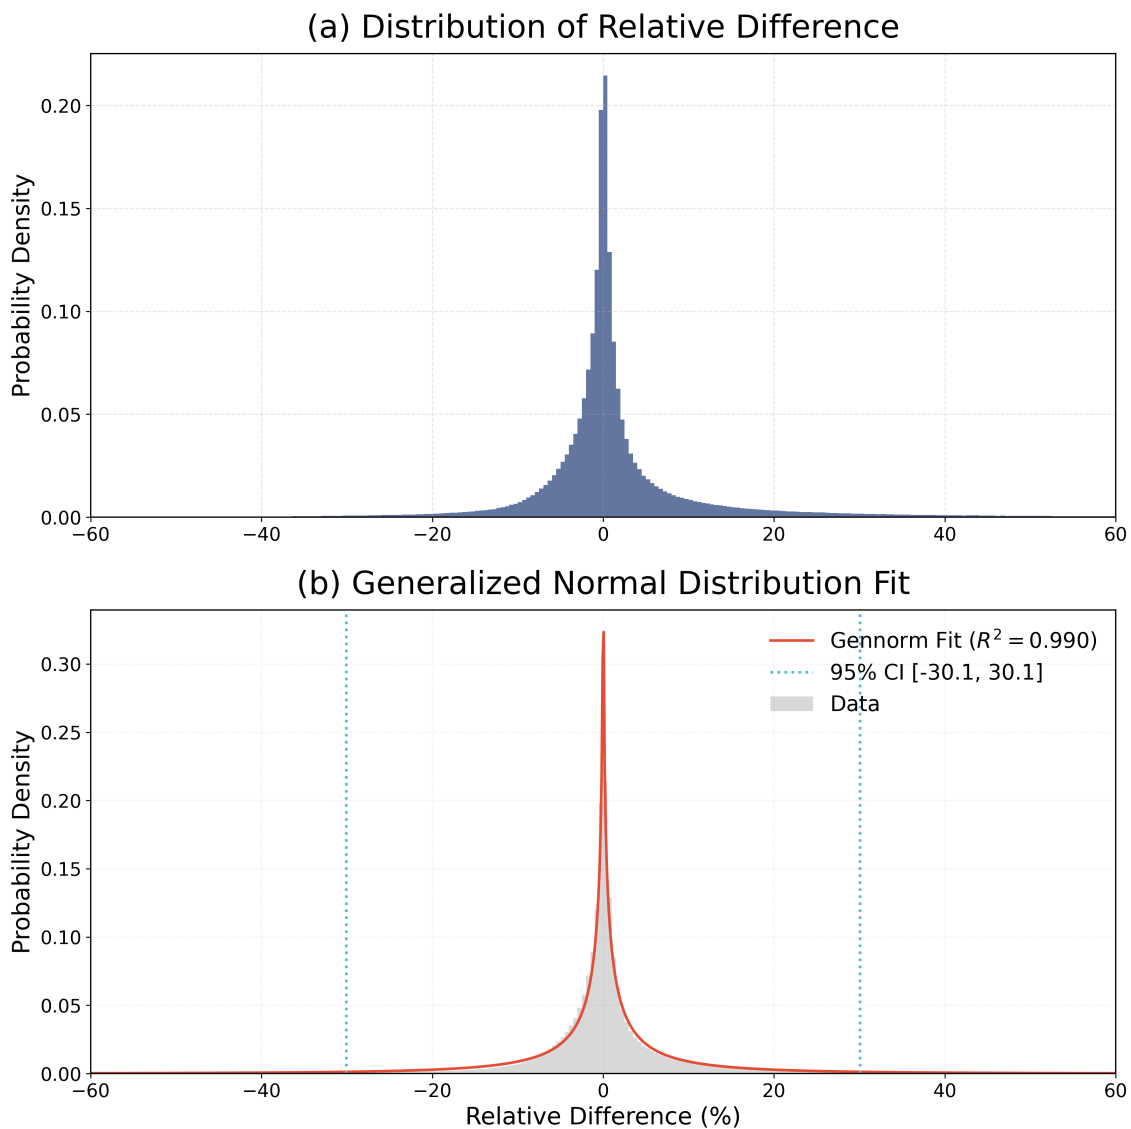

15

**Figure S2. Distribution and generalized normal distribution fit of relative differences between POMINO-GC-Fire and POMINO-GC-NoFire NO<sub>2</sub> VCDs.** (a) Probability density distribution of the relative differences in NO<sub>2</sub> VCDs between the POMINO-GC-Fire and POMINO-GC-NoFire. (b) Generalized normal distribution (gennorm) fitted to the relative difference distribution. The red curve represents the fitted probability density function, with an  $R^2 = 0.99$ , indicating an excellent fit. The blue dashed vertical lines denote the 95% confidence interval, and the gray histogram represents the observed data distribution. Data points falling outside the 95% confidence interval are considered to exhibit statistically significant differences.

20

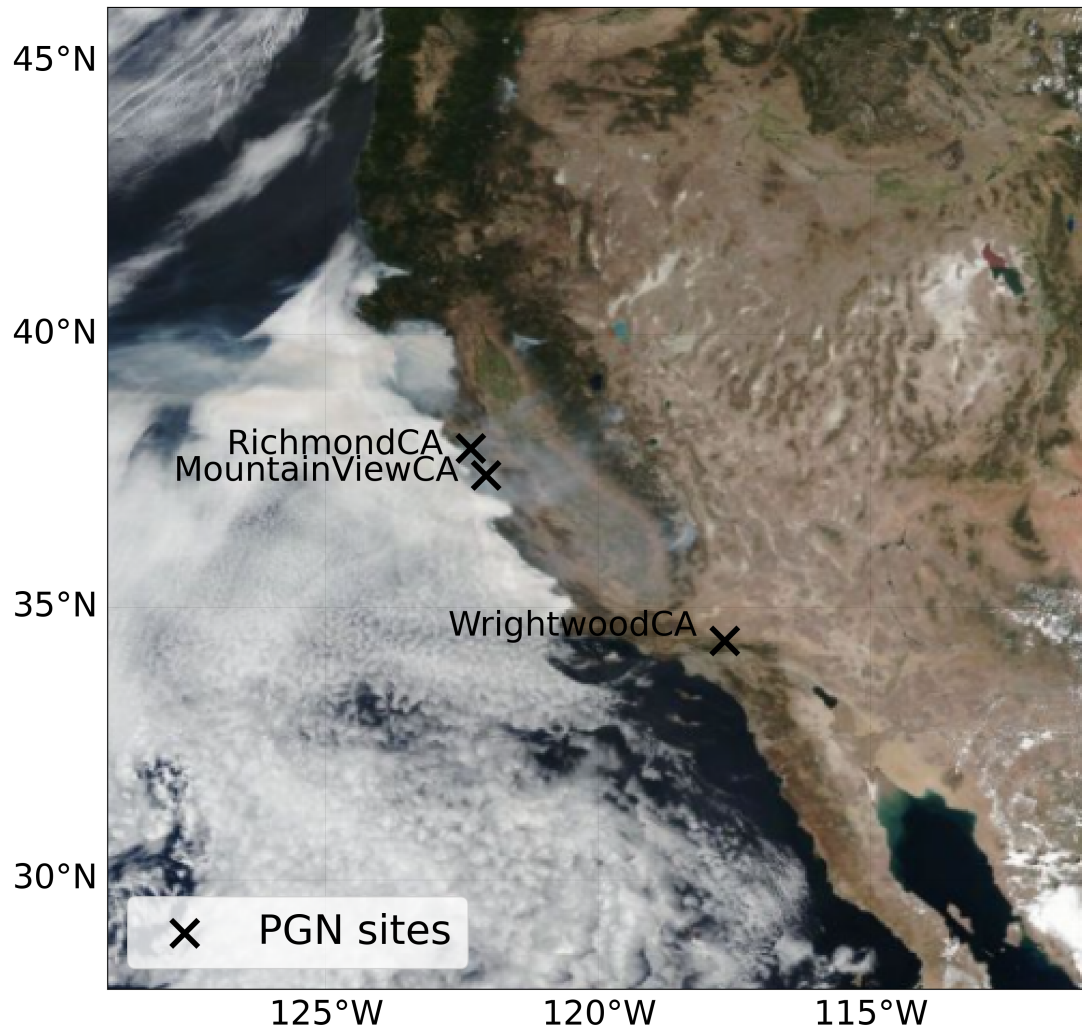

**Figure S3. Spatial distribution of the PGN sites listed in Table S1.** The true-color satellite basemap is sourced from NASA's Fire Information for Resource Management System (FIRMS) (NASA-FIRMS, 2026).

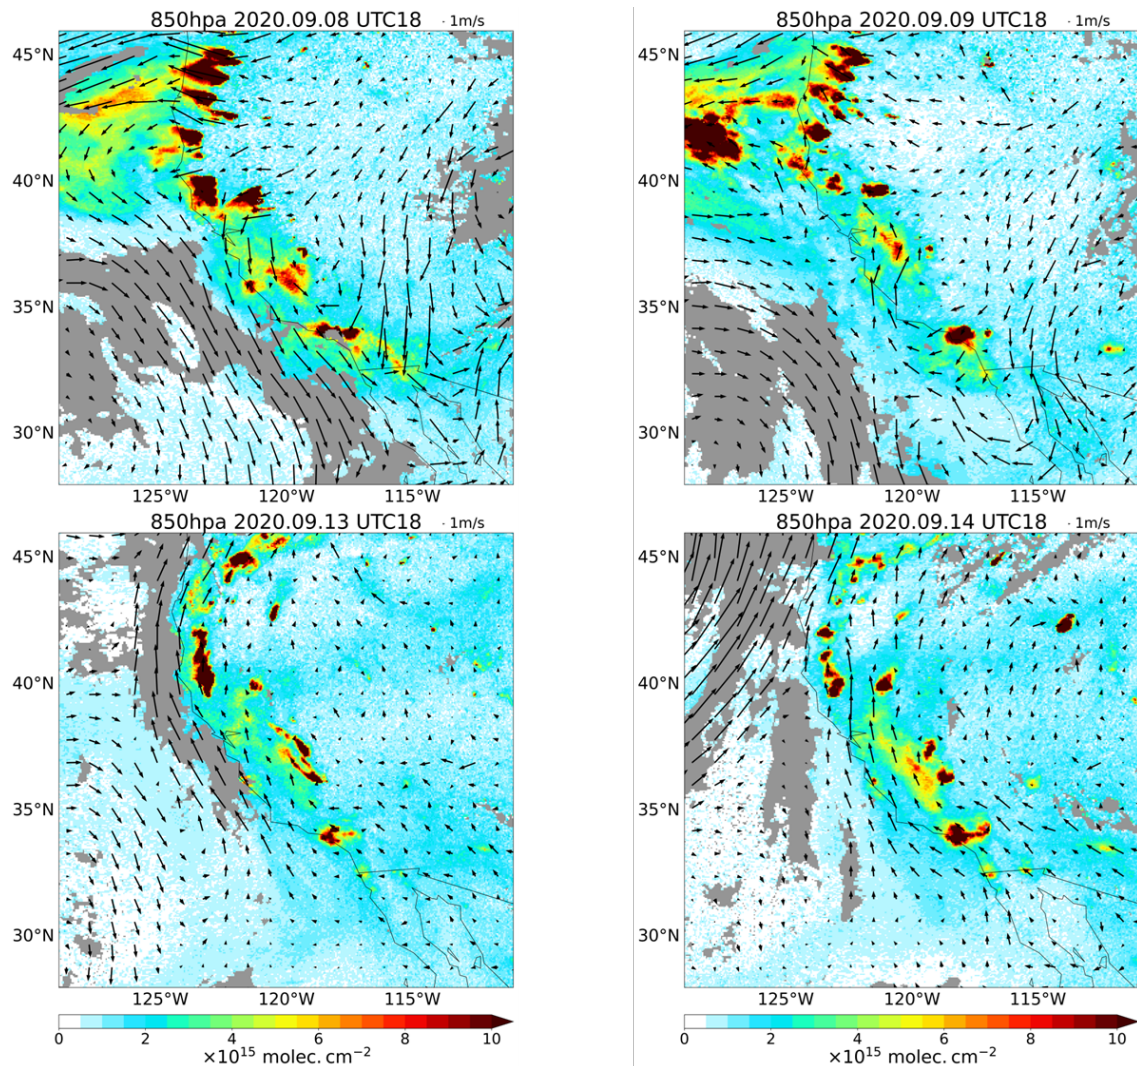

**Figure S4.** European Center for Medium Weather Forecasting (ECMWF) real-time analysis 850hpa wind fields with a horizontal resolution of 9 km (subsamped to 90 km for visualization) overlaid on POMINO-GC-Fire daily NO<sub>2</sub> VCDs. The spatial distribution of retrieved NO<sub>2</sub> VCDs demonstrates clear downwind transport from fire regions, consistent with the ECMWF wind fields.

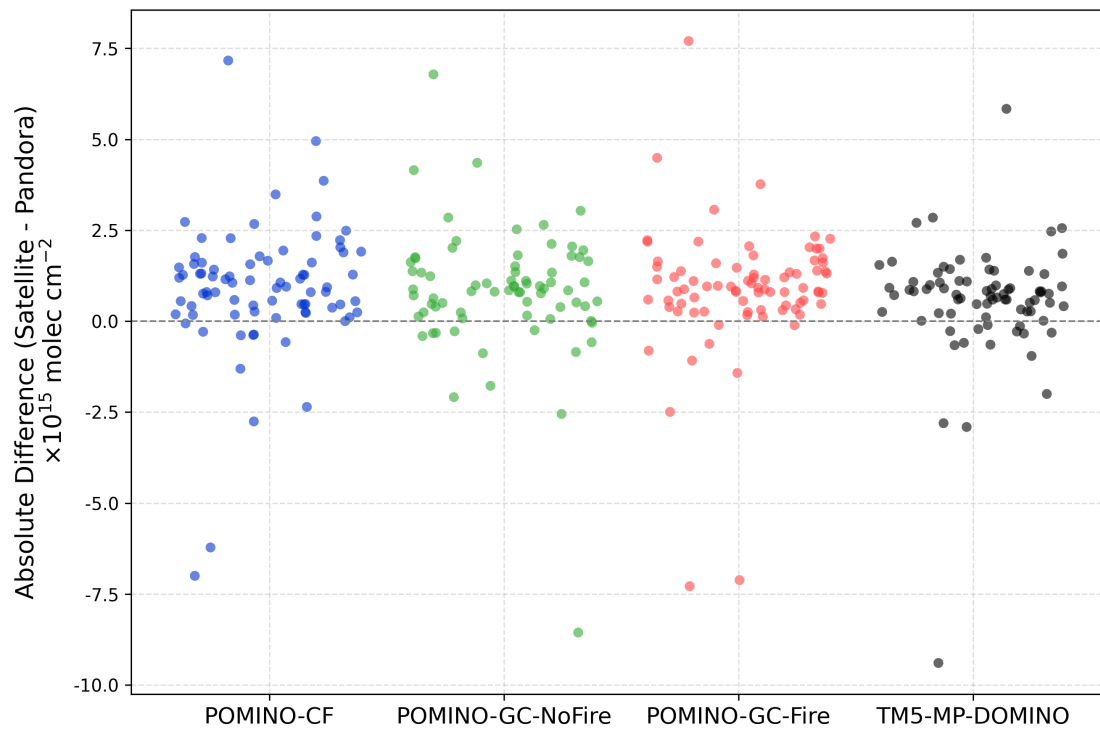

30

**Figure S5. Scatter plot of absolute differences between satellite-derived and PGN NO<sub>2</sub> VCDs**

## References

35 NASA-FIRMS: <https://firms.modaps.eosdis.nasa.gov/map/>, last access: 13 May 2026.
